# Supplementary material for: Flat flexible thin milli-electrode array for real-time in situ water quality monitoring in distribution systems
Source: Royal Society of Chemistry journal article supplement (doi:10.1039/c7ew00103g), 2017-01-01

**Flat flexible thin milli-electrode array for real-time *in situ* water quality  
monitoring in distribution systems**

Zhiheng Xu<sup>1</sup>, Wangchi Zhou<sup>1</sup>, Qiuchen Dong<sup>2</sup>, Yan Li<sup>1</sup>, Dingyi Cai<sup>1</sup>, Yu Lei<sup>2,3</sup>,

Amvrossios Bagtzoglou<sup>1</sup>, Baikun Li<sup>1\*</sup>

<sup>1</sup> Department of Civil & Environmental Engineering, University of Connecticut, Storrs,  
Connecticut 06269, United States

<sup>2</sup> Department of Biomedical Engineering, University of Connecticut, Storrs, Connecticut  
06269, United States

<sup>3</sup> Department of Chemical & Biomolecular Engineering, University of Connecticut,  
Storrs, Connecticut 06269, United States

(\*corresponding author: baikun.li@uconn.edu; Phone: 860-486-2339)

**Figure S1.** Fabrication process of five types of MEA sensors on a Kapton film, including (a) Kapton substrate preparation, (b) printing the gold/ silver layer on the substrate, (c) wire bonding, (d) waterproof layer coating, (e) working electrode modification and (f) the final layout of pH, temperature, conductivity,  $\text{Cl}^-$  and  $\text{ClO}^-$  MEA sensors for real-time monitoring of water quality.

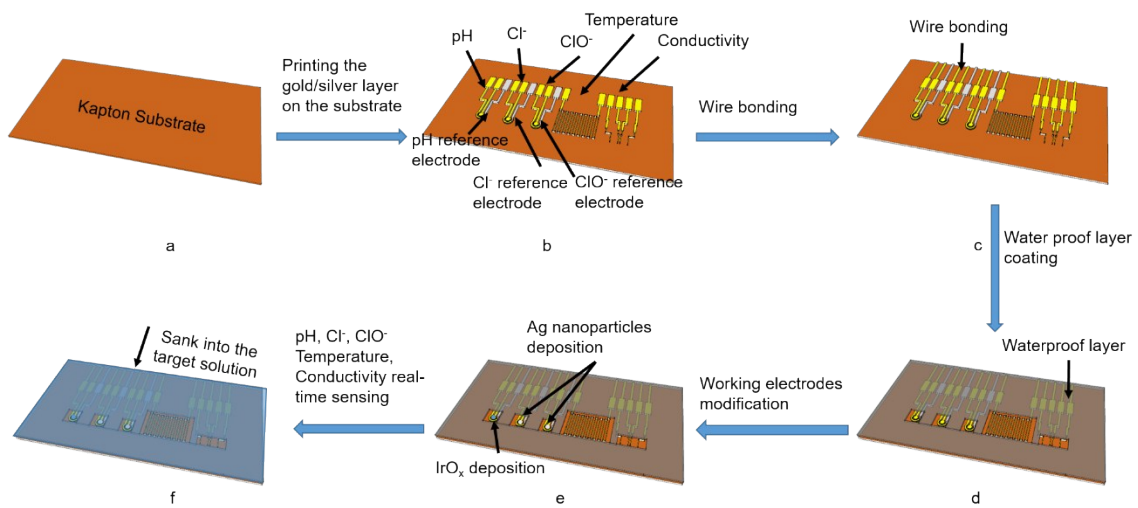

**Figure S2.** MEA calibration and shock experiment setup (Inserted picture: the demo of the MEA sensor film attached to a transparent PVC pipeline for lab tests).

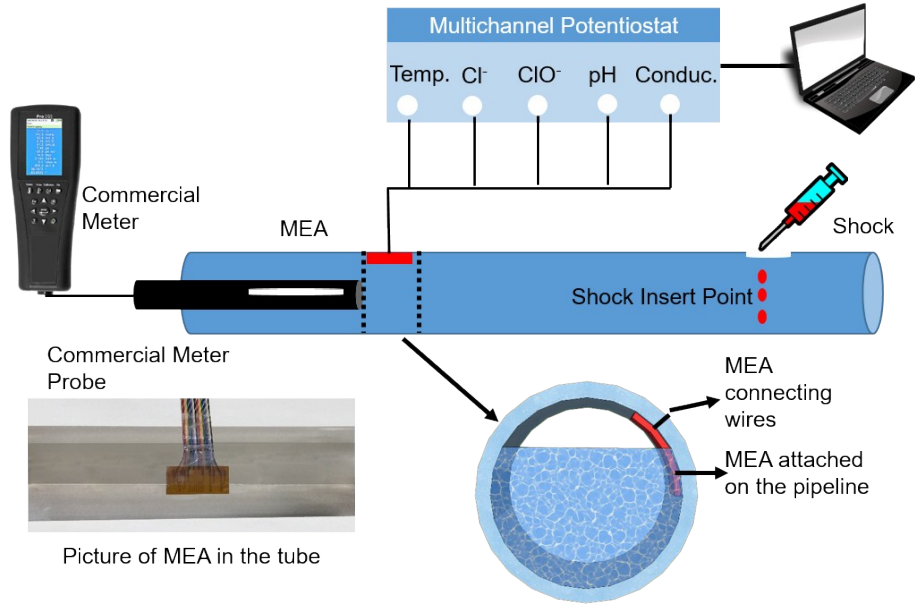

**Figure S3.** Long-term stability of  $\text{Cl}^-$  and  $\text{ClO}^-$  MEAs within 4-week operational period, including (a) experiment setup. The resistance of a MEA with the working electrode modified by Ag nanoparticles immersed into tap water was continuously read using a multiple meter during 4-week period, (b) the variation of the resistance of MEA sensors over 4-week period (Insert pictures: microscale images of the silver working electrodes before and after immersion into tap water for 4 weeks, scale bar  $100\mu\text{m}$ ) and (c) microscale images of the working electrodes before the CV program was conducted and after 500 circles of the CV program.

a.

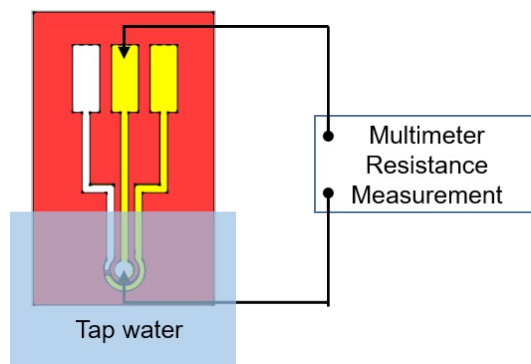

b.

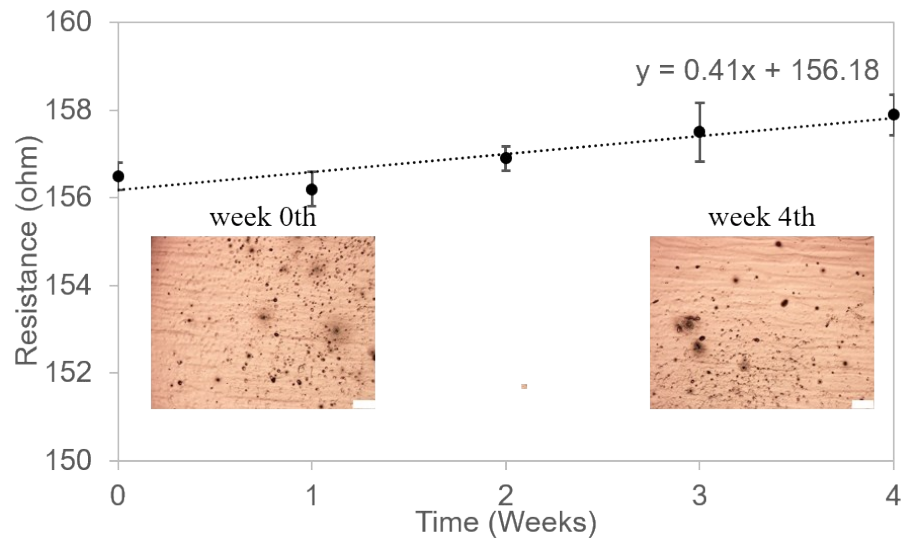

c.

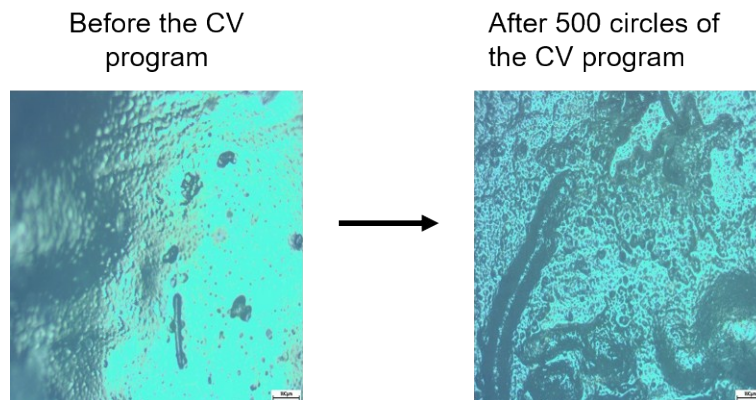

**Figure S4.** Selectivity tests of MEA sensors using cyclic voltammetry (CV) curve. (a) the silver (Ag) working electrode of a chloride ( $\text{Cl}^-$ ) MEA in 32mM chloride ( $\text{Cl}^-$ ) solution, and (b) the silver (Ag) working electrode of a hypochlorite ( $\text{ClO}^-$ ) MEA in 32mM hypochlorite ( $\text{ClO}^-$ ) solution.

a.

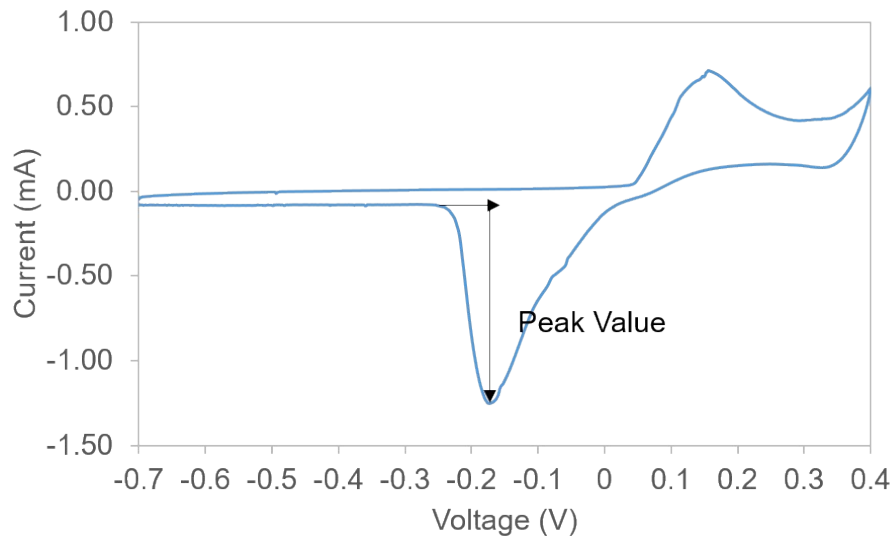

b.

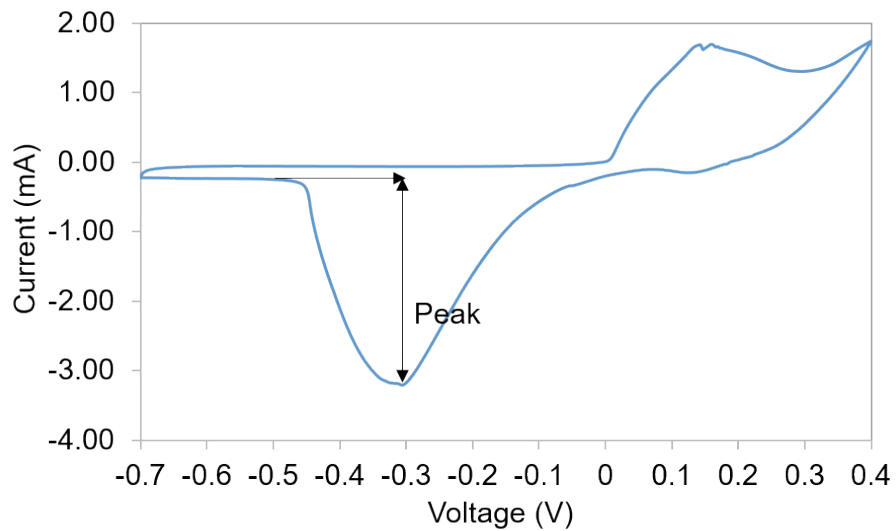

**Figure S5.** (a) Potential readings of the Cl<sup>-</sup> MEA changes over time and (b) open potential responses (mV) of the Cl<sup>-</sup> MEA at different Cl<sup>-</sup> concentrations (The dashed line shows the trend).

a.

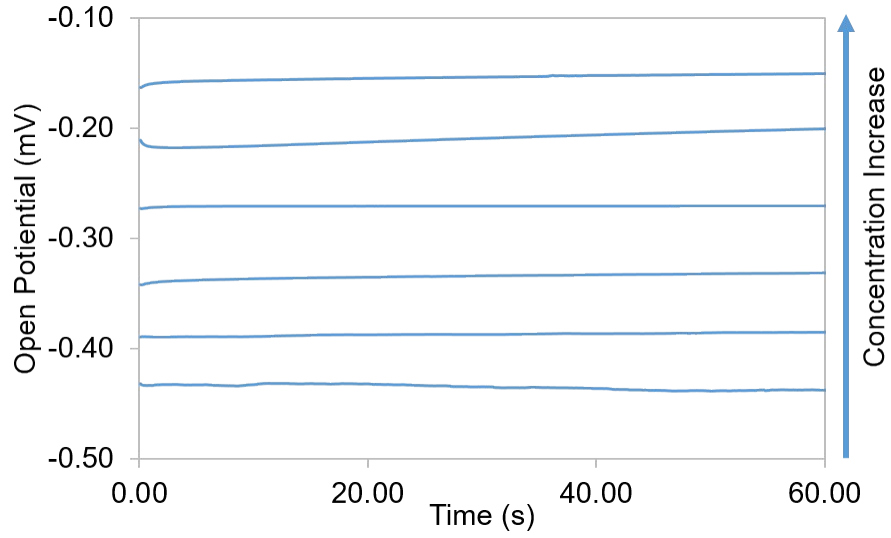

b.

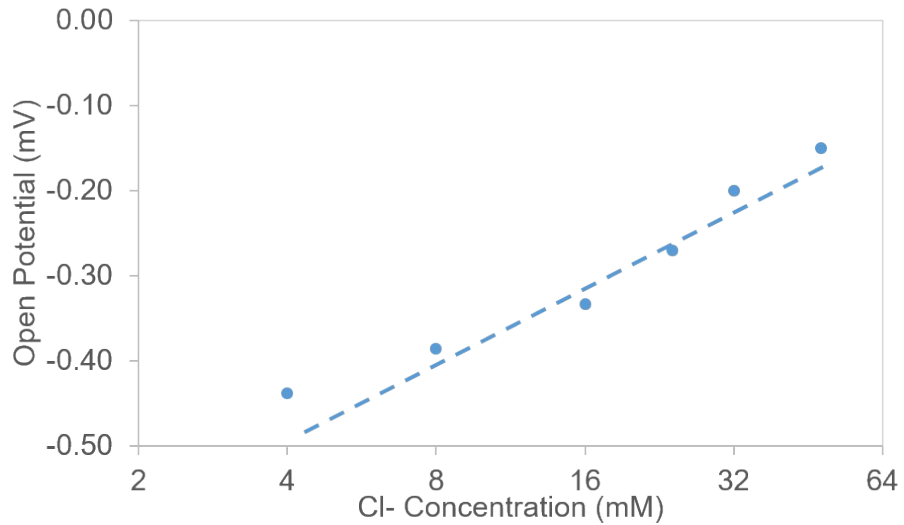

**Figure S6.** (a) The linear regression model of the temperature MEA resistance ( $\Omega$ ) v.s. temperature ( $^{\circ}\text{C}$ ), (b) the response of temperature MEA to the temperature shock and (c) the linearity regression model of the conductivity MEA resistance ( $\Omega$ ) v.s. conductivity ( $\mu\text{s}/\text{cm}$ ).

a.

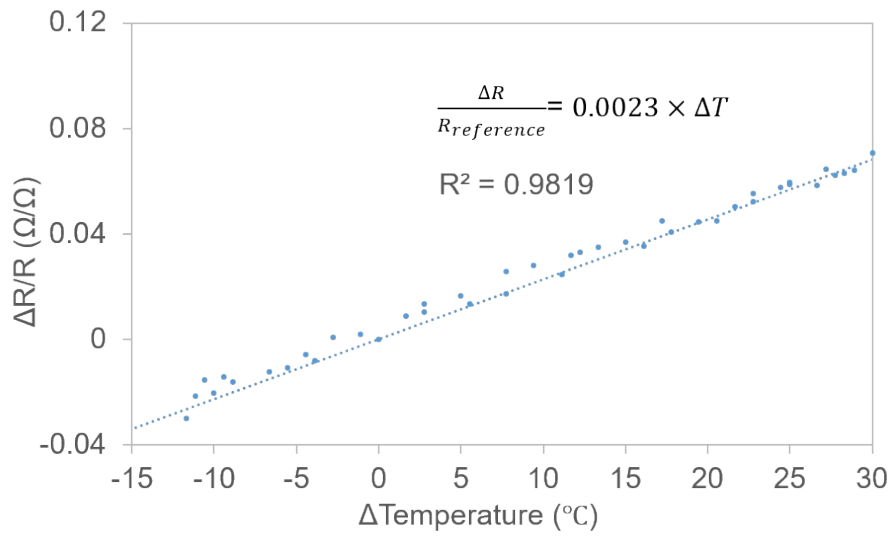

b.

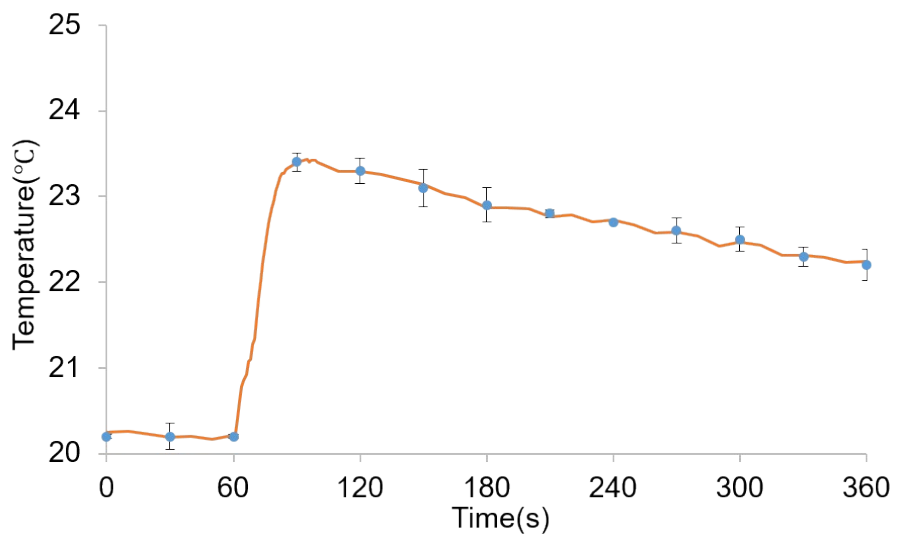



c.

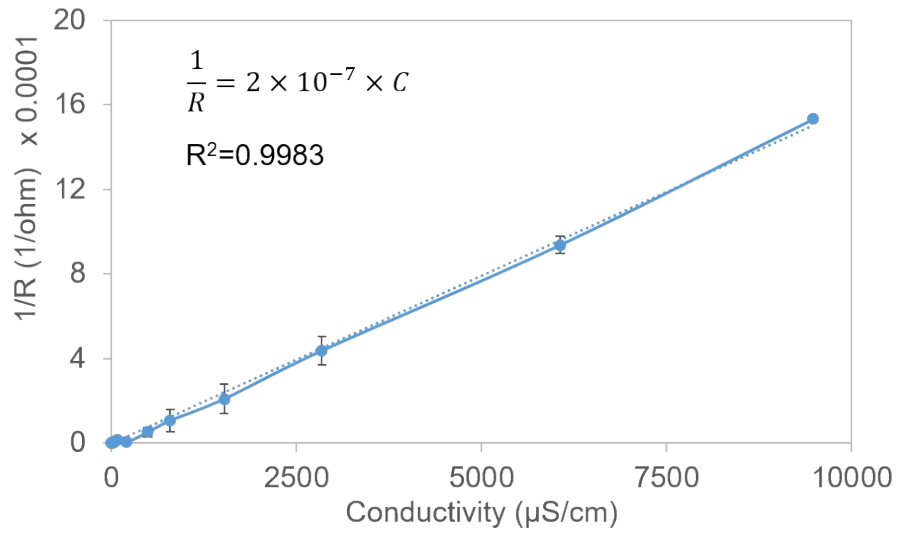

**Figure S7.** (a) Potential readings of the pH MEA in the pH=3-11 solutions change over time and (b) the linear regression model of the pH MEA potential (V) vs pH.

a.

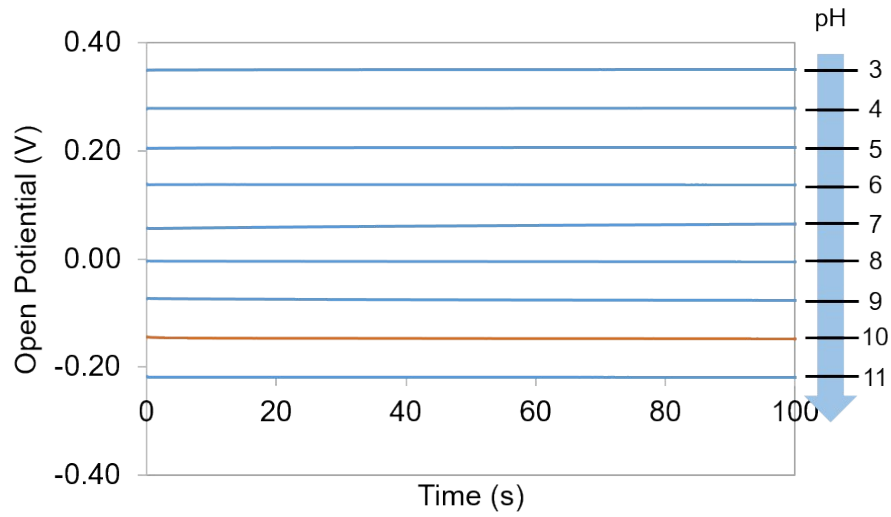

b.

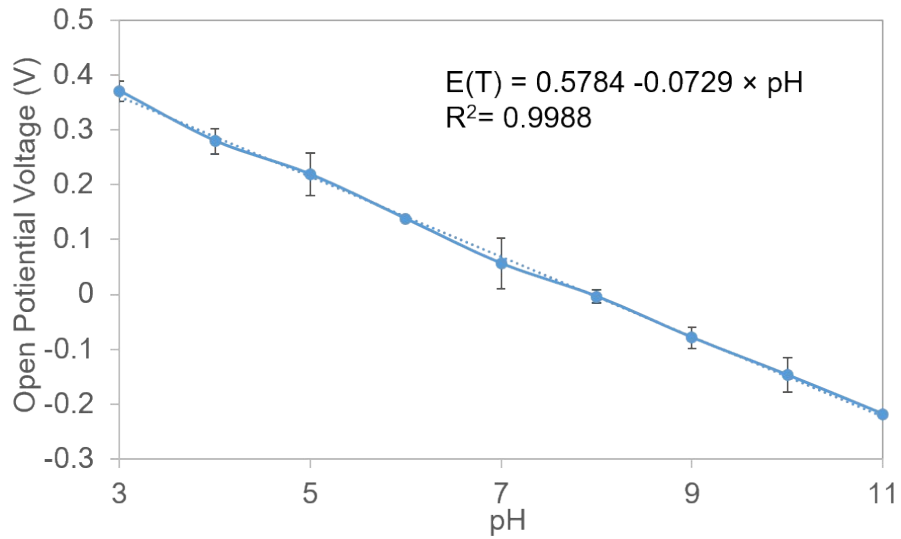

**Figure S8.** The response of MEA sensors to the shock of Cl<sup>-</sup> dropping from 8 mM ( $C_0$ ) to 5.4 mM ( $C_{\text{final}}$ ) (Inserted figure: CV curves of Cl<sup>-</sup> before and after shocks).

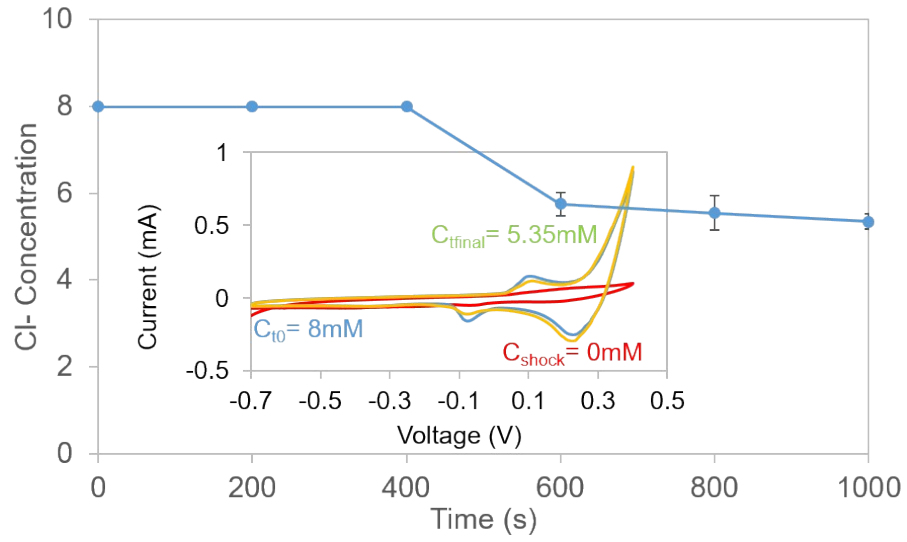

Supplement: c7ew00103g1.pdf [file c7ew00103g1.pdf]
